# Supplementary material for: Acid-etched Fe/Fe2O3 nanoparticles encapsulated into carbon cloth as a novel voltammetric sensor for the simultaneous detection of Cd2+ and Pb2
Source: Royal Society of Chemistry journal article supplement (doi:10.1039/d0an01861a), 2020-11-05
Supplement: d0an01861a1.pdf [file d0an01861a1.pdf]

## Supporting Information

# **Acid-etched Fe/Fe<sub>2</sub>O<sub>3</sub> nanoparticles encapsulated into carbon cloth as a novel voltammetric sensor for the simultaneous detection of Cd<sup>2+</sup> and Pb<sup>2+</sup>**

Fudan Zhu<sup>a,‡</sup>, Huilan Shi<sup>a,‡</sup>, Zhe Yu<sup>a</sup>, Cunli Wang<sup>a</sup>, Wenjing Cheng<sup>a</sup>, Xian Zhou<sup>a</sup>,  
Fengchun Yang<sup>a,\*</sup>, Yuxi Zhang<sup>b,\*</sup>, Xin Zhang<sup>a,\*</sup>

<sup>a</sup>*Key Laboratory of Synthetic and Natural Functional Molecule Chemistry of Ministry of Education, National Demonstration Center for Experimental Chemistry Education, College of Chemistry & Material Science, Northwest University, Xi'an 710127, China.*

<sup>b</sup>*The Institute of Hydrogeology and Environmental Geology, Chinese Academy of Geological Sciences, Shijiazhuang 050061, China.*

*\*Corresponding author: Fengchun Yang, Weidong Kang, Xin Zhang*

*Email address: fyang@nwu.edu.cn*

*kobzhang@qq.com*

*zhangxin@nwu.edu.cn*

---

\* Corresponding author.

E-mail: fyang@nwu.edu.cn, kobzhang@qq.com, zhangxin@nwu.edu.cn

‡Fudan Zhu and Huilan Shi contributed equally to this work.

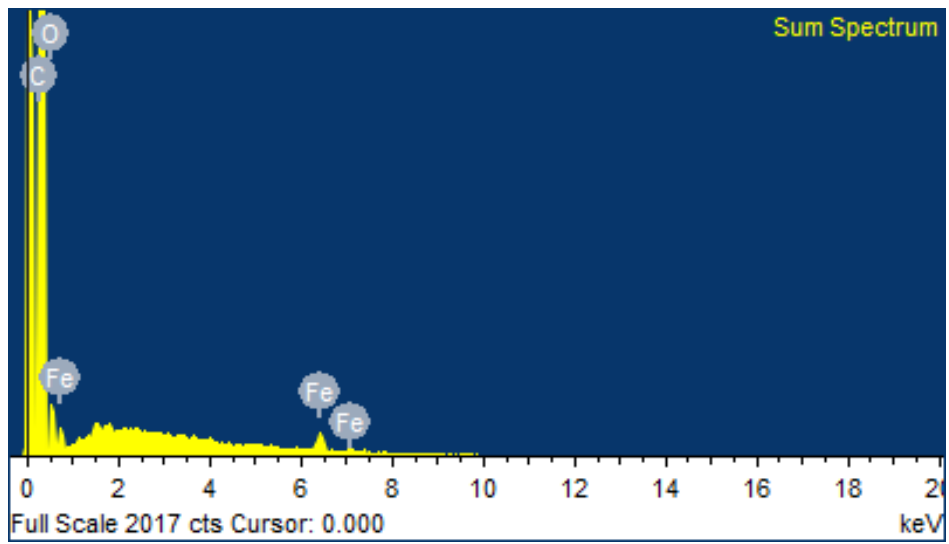

Fig. S1 EDS of ae-Fe/Fe<sub>2</sub>O<sub>3</sub>@CC.

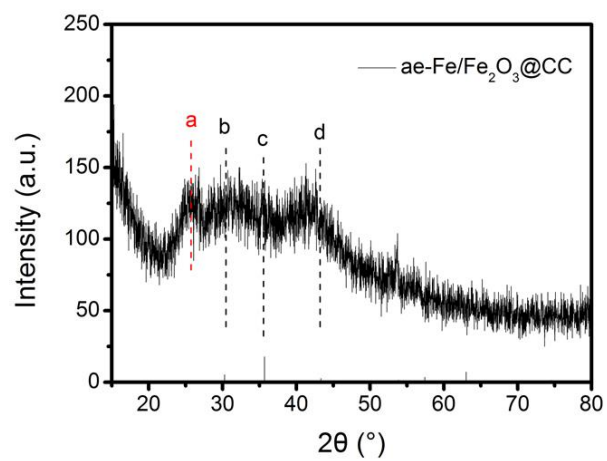

Fig. S2 XRD spectra of ae-Fe/ Fe<sub>2</sub>O<sub>3</sub>@CC.

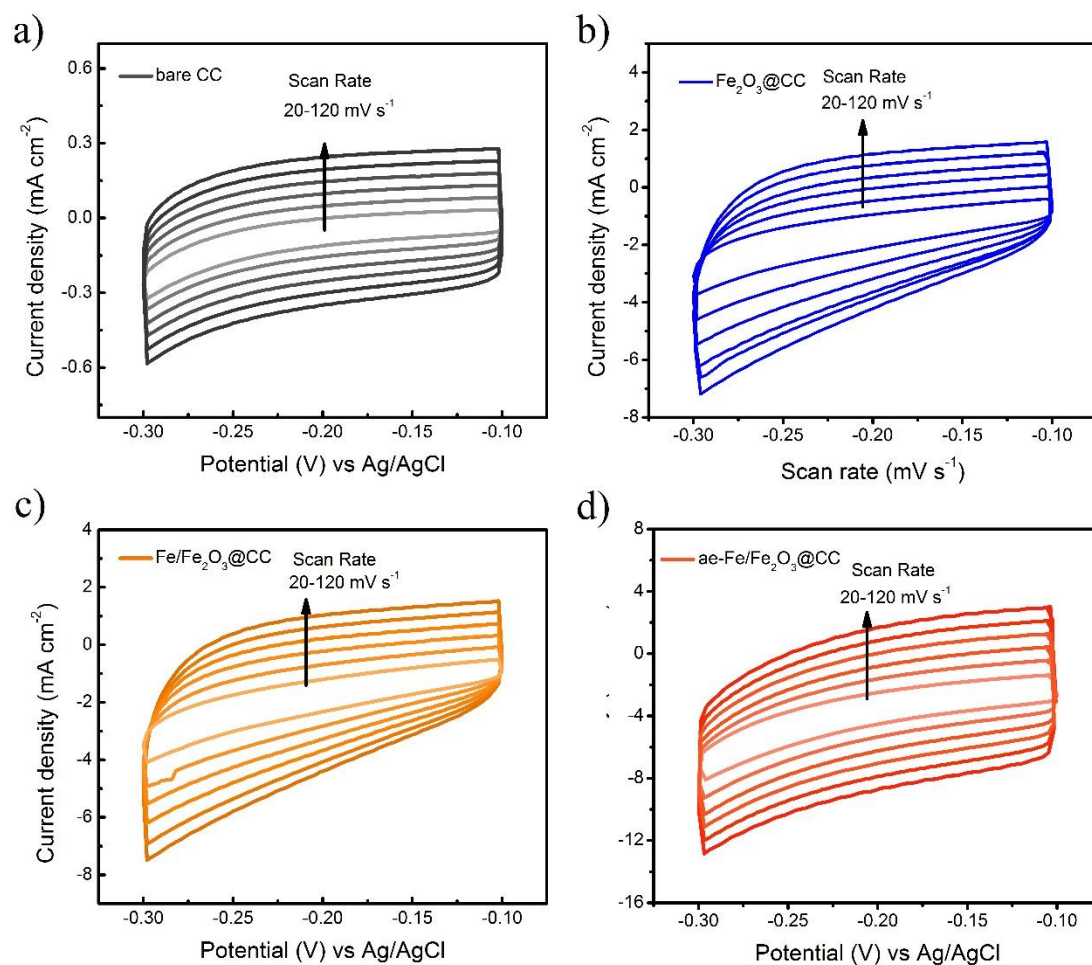

Fig. S3 Voltammograms of the a) bare CC; b) Fe<sub>2</sub>O<sub>3</sub>@CC, c) Fe/Fe<sub>2</sub>O<sub>3</sub>@CC and d) ae-Fe/Fe<sub>2</sub>O<sub>3</sub>@CC at various scan rates (20 - 120 mV s<sup>-1</sup>) used to estimate the C<sub>dl</sub> and relative electrochemically active surface area.

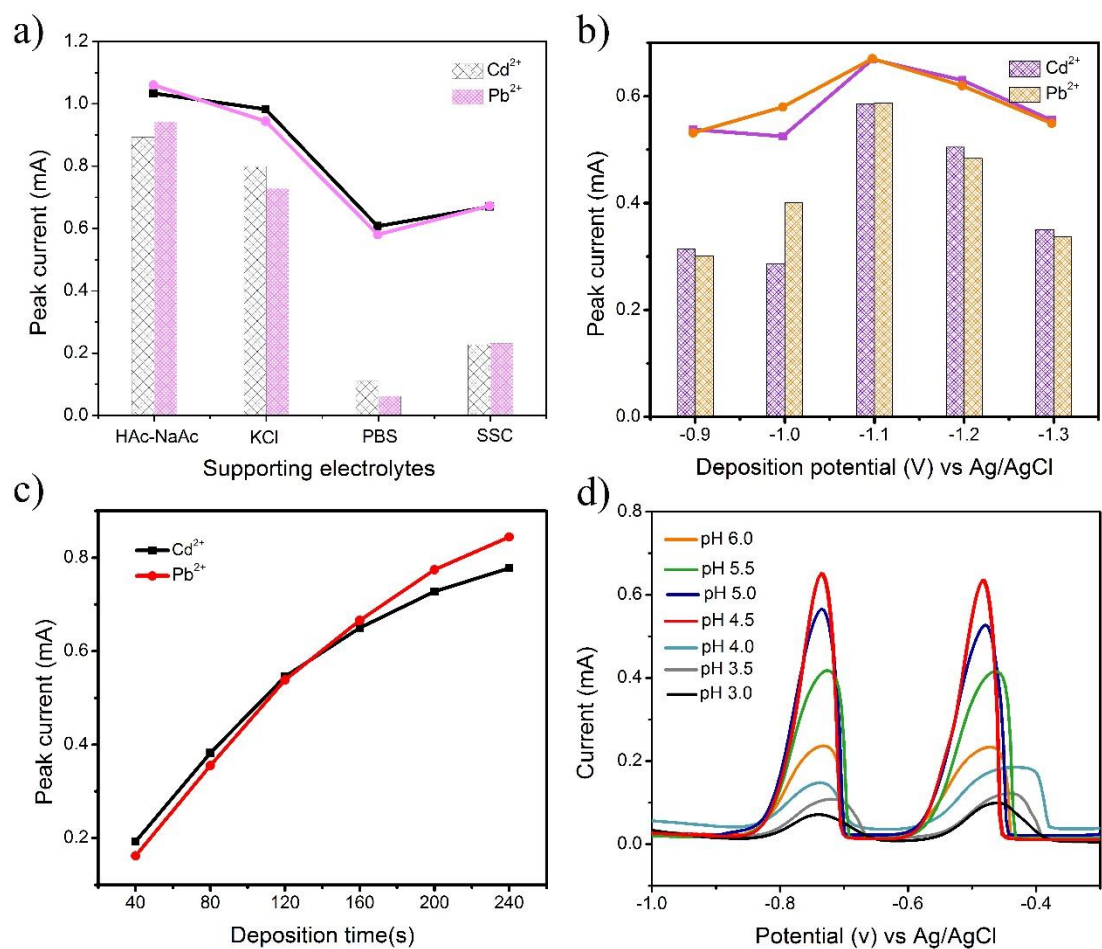

Fig. S4 Experimental condition optimization. Influences of a) supporting electrolyte; b) deposition potential; c) deposition time and d) pH were studied by DPASV with 0.1 M Cd(II) and Pb(II) on the ae-Fe/Fe<sub>2</sub>O<sub>3</sub>@CC.

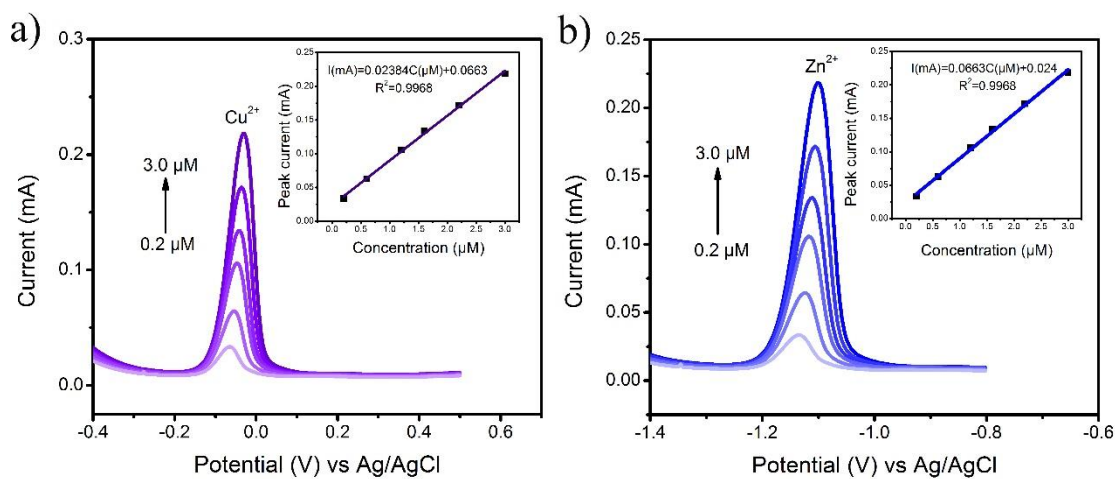

Fig. S5 DPASV responses and linear equations (inset) of ae-Fe/Fe<sub>2</sub>O<sub>3</sub>@CC toward a) Cu(II), b) Zn(II) under the same experimental conditions.
